# Supplementary material for: Gated electron transfer reactions of truncated hemoglobin from Bacillus subtilis differently orientated on SAM-modified electrodes
Source: Royal Society of Chemistry journal article supplement (doi:10.1039/c5cp00960j), 2015-01-01
Supplement: c5cp00960j1.pdf [file c5cp00960j1.pdf]

## Electronic Supporting Information

### Gated Electron Transfer Reactions of Truncated Hemoglobin from *Bacillus subtilis* Differently Orientated on SAM-modified Electrodes

Deby Fapyane<sup>a</sup>, Andrey Kartashov<sup>a</sup>, Claes von Wachenfeldt<sup>b</sup>, and Elena E. Ferapontova<sup>a</sup>

<sup>a</sup> Interdisciplinary Nanoscience Center (iNANO), Science and Technology, Aarhus University, Gustav Wieds Vej 1590-14, DK-8000 Aarhus C, Denmark;

<sup>b</sup> Department of Biology, Lund University, Sölvegatan 35, SE-223 62 Lund, Sweden

### Figures

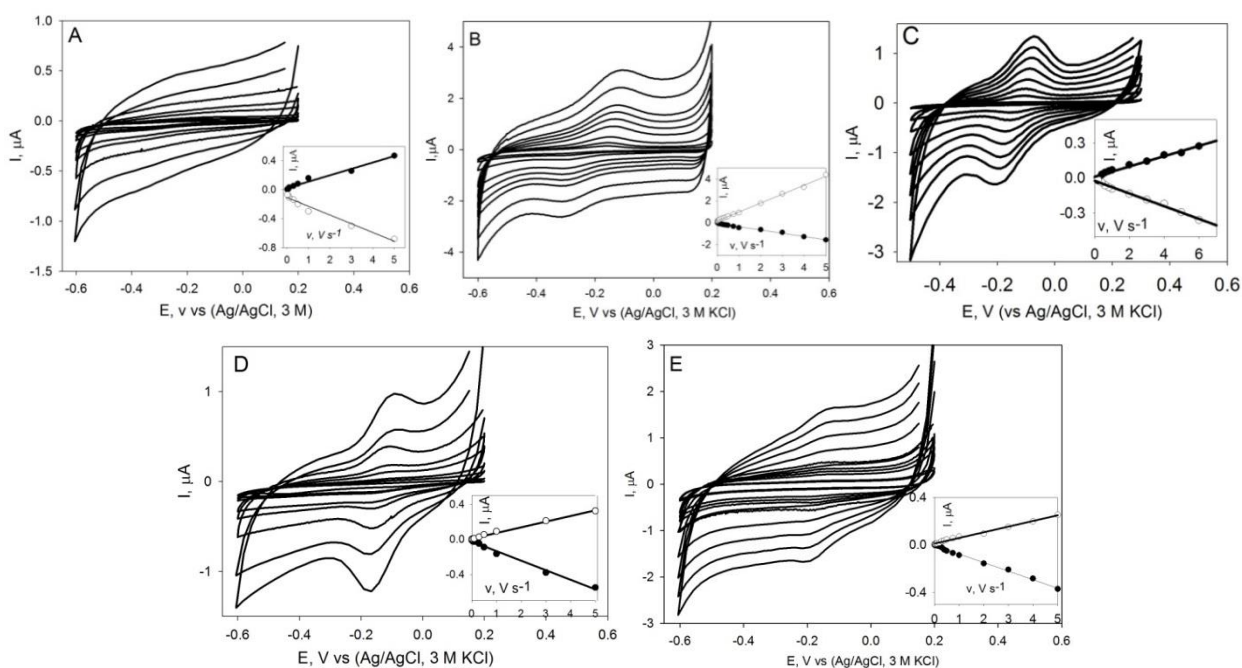

**Figure S1.** Representative cyclic voltammograms recorded at different scan rates in deaerated 10 mM PBS with *TrHb-Bs* -modified electrodes; *TrHb-Bs* was adsorbed onto (a) C<sub>11</sub>OH-, and covalently attached to (b) C<sub>5</sub>COOH-, (c) C<sub>8</sub>NH<sub>2</sub>-, (d) C<sub>6</sub>NH<sub>2</sub>-, and (e) C<sub>2</sub>NH<sub>2</sub>-modified gold electrodes, pH 7.0. Insets: The dependence of anodic and cathodic peak currents on the potential scan rate.

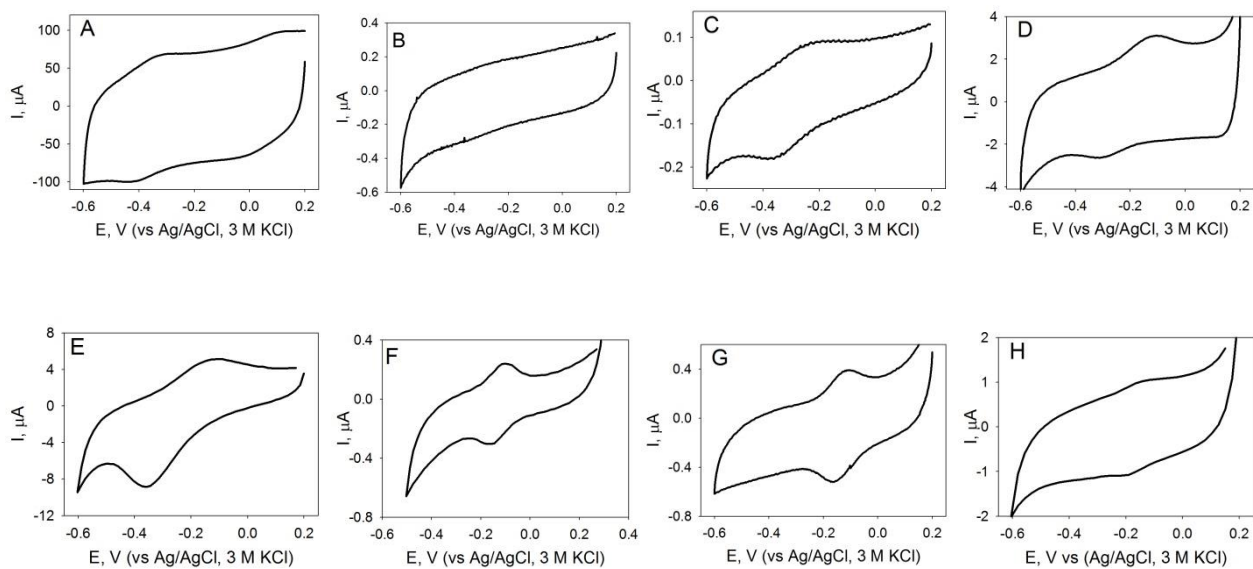

**Figure S2.** Representative CVs recorded in deaerated 10 mM PBS with *TrHb-Bs*-modified electrodes: (a) graphite, (b)  $\text{C}_{11}\text{OH}$ -, (c)  $\text{C}_{10}\text{COOH}$ -, (d)  $\text{C}_5\text{COOH}$ -, (e)  $\text{C}_{11}\text{NH}_2$ -, (f)  $\text{C}_8\text{NH}_2$ -, (g)  $\text{C}_6\text{NH}_2$ - and (h)  $\text{C}_2\text{NH}_2$ -modified gold electrodes, pH 7.0, potential scan rate  $1 \text{ V s}^{-1}$ .

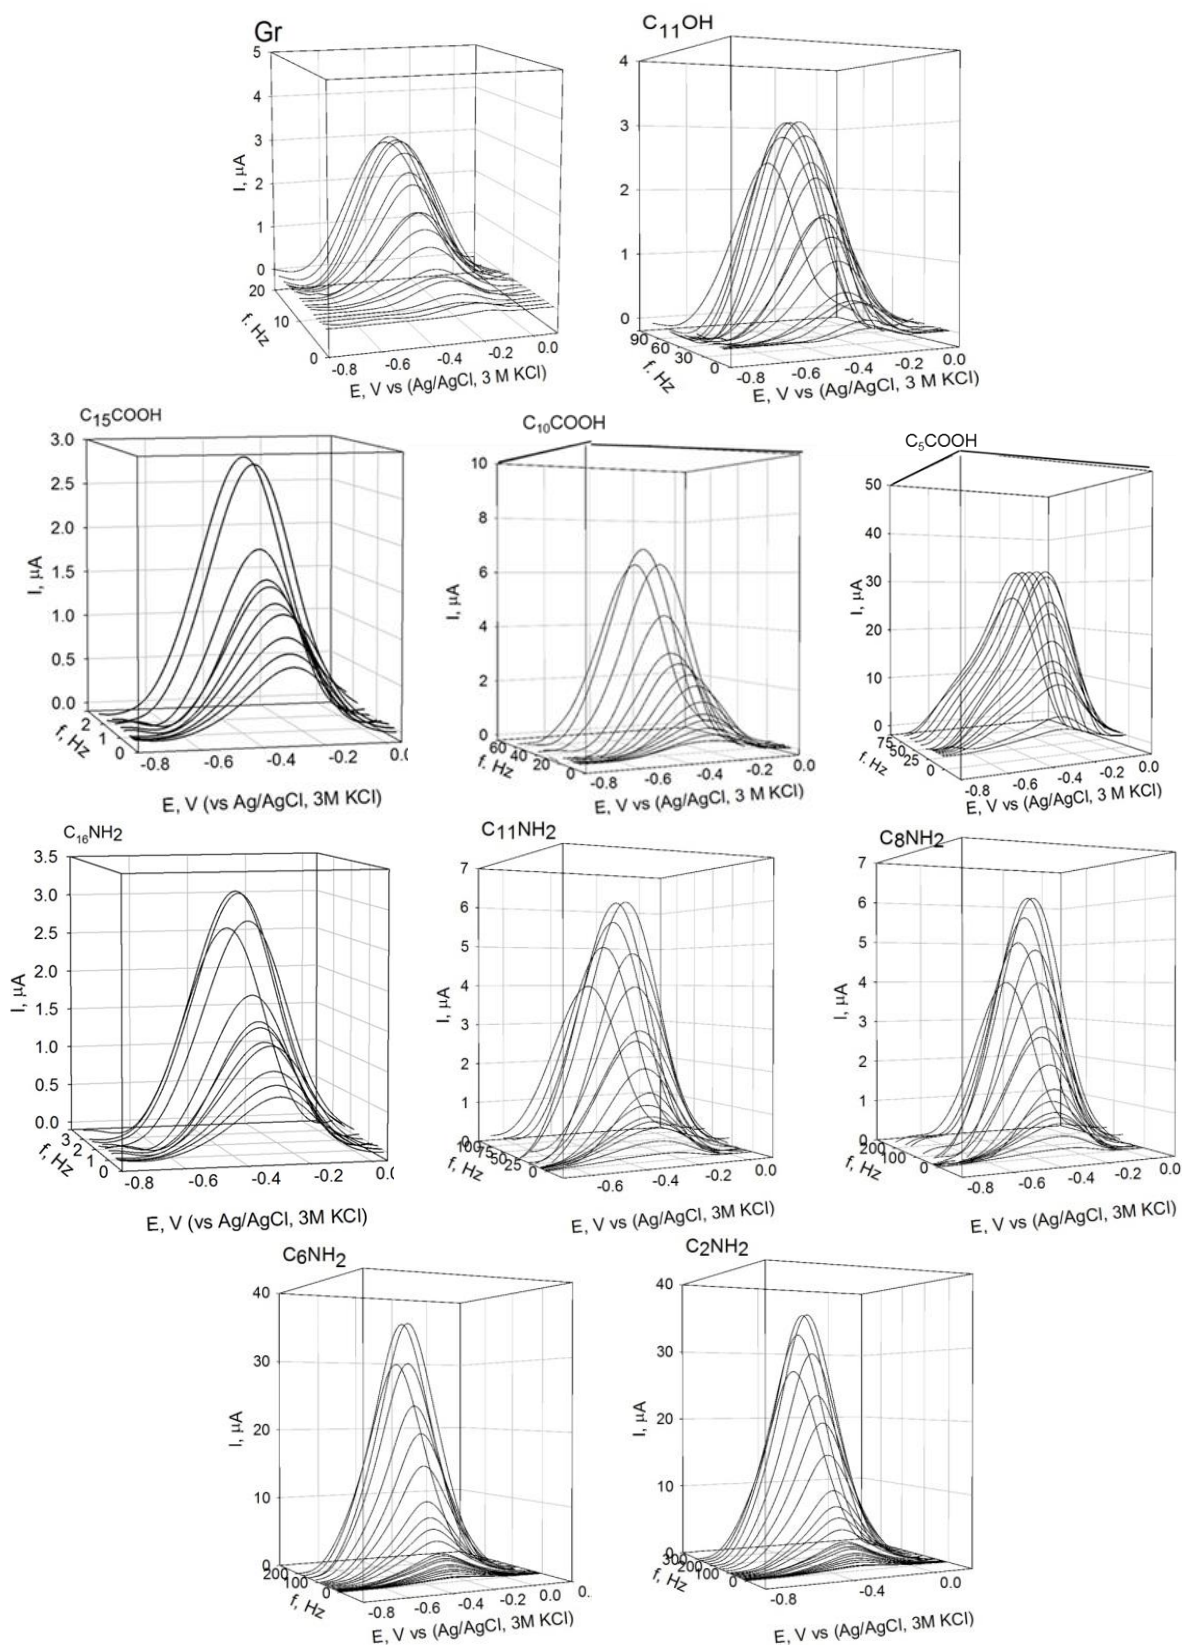

**Figure S3.** Representative background corrected SWVs recorded in deaerated 10 mM PBS, pH 7, with *TrHb-Bs*-modified electrodes: graphite, OH and COOH terminated- and  $\text{NH}_2$ - terminated SAMs of different alkane chain lengths.

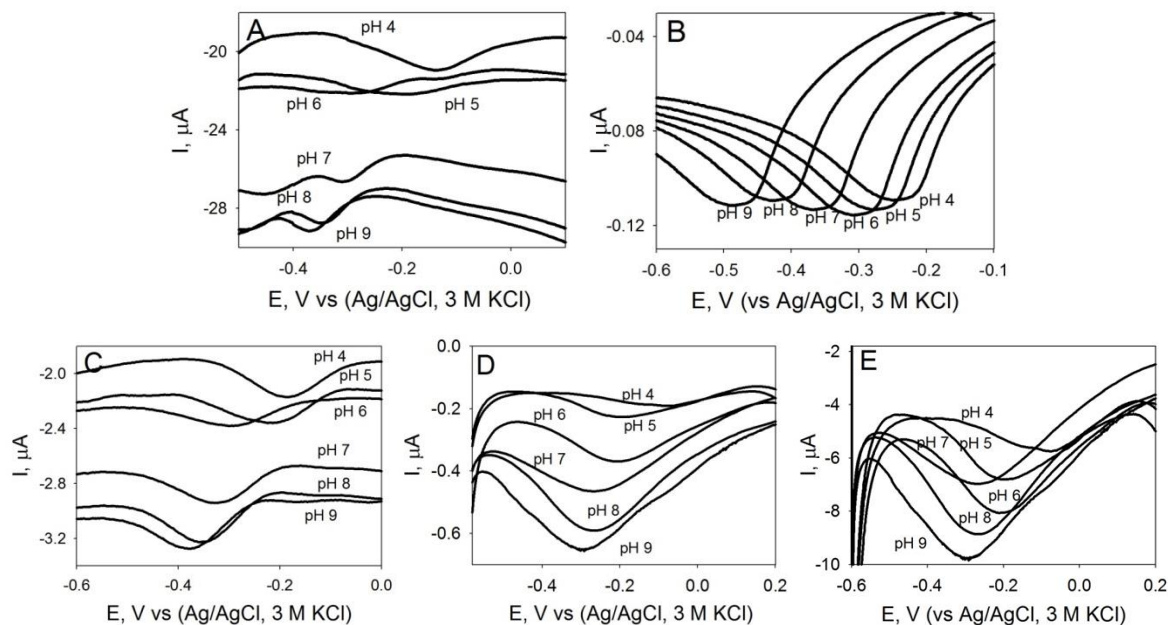

**Figure S4.** Representative DPVs recorded in deaerated 10 mM PBS with *TrHb-Bs* -modified electrodes: (a) graphite, (b)  $C_{16}NH_2$ , (c)  $C_{11}NH_2$ , (d)  $C_6NH_2$  and (e)  $C_2NH_2$  -modified gold electrodes; pH 4.0, 5.0, 6.0, 7.0, 8.0, and 9.0.

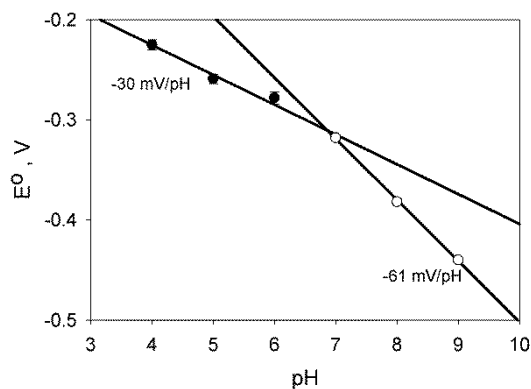

**Figure S5.** pH dependences of the heme redox potential in *trHb-Bs* immobilized on  $C_{16}NH_2$ , (modified gold, DPV (Figure S4, ESI) were recorded in deaerated 10 mM PBS of the corresponding pH.

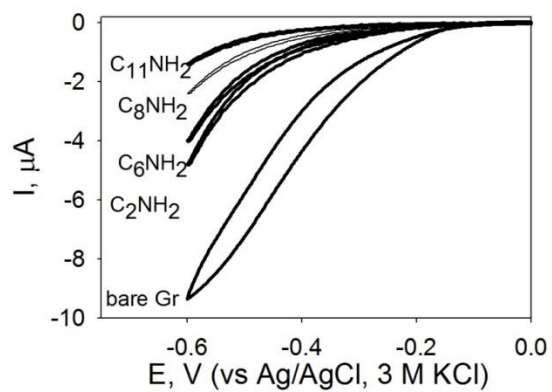

**Figure S6.** Representative cyclic voltammograms of  $O_2$  reduction at bare graphite electrode and gold electrodes modified with  $C_{11}NH_2$ ,  $C_8NH_2$ ,  $C_6NH_2$  and  $C_2NH_2$  SAMs recorded in 10 mM PBS, pH 7, potential scan rate  $0.05 V s^{-1}$ .

## Tables

**Table S1.** The atomic packing density  $\rho$  (the fraction of the volume between redox centres that is within the united van der Waals radius of intervening atoms), the distance  $r$  between the heme iron of trHb-*Bs* and the corresponding surface amino acid residues, and resulting ET rates.

| Amino acid | Sequence position | distance, Å | density, $\rho$ | $k_{ET}$ | $\log k_{ET}$ |
|------------|-------------------|-------------|-----------------|----------|---------------|
| Asp, D     | 22                | 13,55       | 0,93            | 2,95E+08 | 8,47          |
|            | 41                | 12,69       | 0,42            | 1,32E+05 | 5,12          |
|            | 87                | 11,33       | 0,95            | 4,79E+09 | 9,68          |
|            | 95                | 15,90       | 0,94            | 4,07E+07 | 7,61          |
|            | 98                | 18,83       | 0,85            | 1,32E+05 | 5,12          |
| Glu, E     | 10                | 21,72       | 0,85            | 3,98E+03 | 3,60          |
|            | 14                | 18,69       | 0,66            | 7,94E+02 | 2,90          |
|            | 15                | 19,54       | 0,82            | 2,19E+04 | 4,34          |
|            | 26                | 13,43       | 0,90            | 2,19E+08 | 8,34          |
|            | 44                | 12,32       | 0,87            | 4,27E+08 | 8,63          |
|            | 65                | 17,15       | 0,96            | 1,91E+07 | 7,28          |
|            | 66                | 15,94       | 0,84            | 3,63E+06 | 6,56          |
|            | 84                | 12,87       | 0,81            | 3,47E+08 | 8,54          |
|            | 103               | 22,10       | 0,64            | 2,00E+00 | 0,30          |
|            | 105               | 21,52       | 0,91            | 5,50E+04 | 4,74          |
|            | 108               | 18,58       | 0,91            | 9,55E+05 | 5,98          |
| 115        | 11,92             | 0,85        | 4,90E+08        | 8,69     |               |
| Asn, N     | 6                 | 24,91       | 0,85            | 1,00E+02 | 2,00          |
|            | 83                | 13,00       | 0,84            | 1,12E+08 | 8,05          |
|            | 123               | 9,67        | 0,74            | 2,00E+09 | 9,30          |
| Gln, Q     | 19                | 16,18       | 0,68            | 5,25E+04 | 4,72          |
|            | 49                | 5,04        | 0,67            | 1,10E+12 | 12,04         |
|            | 51                | 12,11       | 0,82            | 2,69E+08 | 8,43          |
|            | 55                | 13,34       | 0,82            | 5,75E+07 | 7,76          |
| Lys, K     | 35                | 11,75       | 0,85            | 6,46E+08 | 8,81          |
|            | 48                | 9,13        | 0,81            | 9,77E+09 | 9,99          |
|            | 50                | 10,57       | 0,78            | 1,07E+09 | 9,03          |
|            | 94                | 13,81       | 0,86            | 6,61E+07 | 7,82          |
| Arg, R     | 27                | 13,09       | 0,69            | 7,41E+06 | 6,87          |
|            | 47                | 11,52       | 0,65            | 3,98E+07 | 7,60          |
|            | 73                | 8,37        | 0,76            | 1,55E+10 | 10,19         |
|            | 75                | 7,15        | 0,74            | 6,92E+10 | 10,84         |
|            | 85                | 9,16        | 0,89            | 2,00E+10 | 10,30         |
|            | 107               | 17,68       | 0,78            | 9,12E+04 | 4,96          |
|            | 113               | 12,02       | 0,78            | 1,48E+08 | 8,17          |
|            | 119               | 10,25       | 0,87            | 5,01E+09 | 9,70          |
